# Supplementary material
Source: publisher figshare collection journal article supplement (https://acs.figshare.com/ndownloader/files/5060752)
Supplement: Supplementary file 1 [file 5060752]

## Supplementary Material

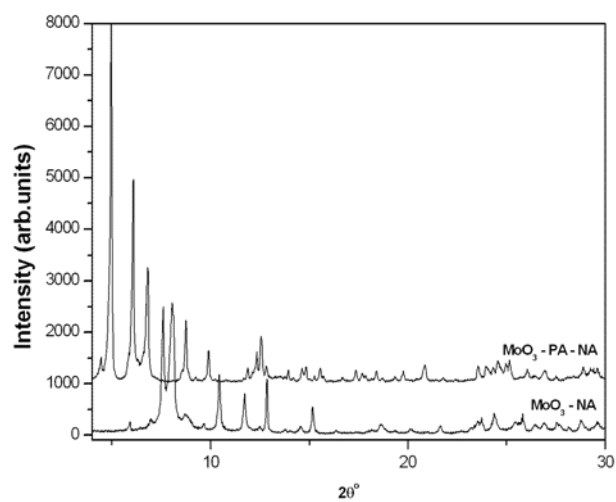

**Figure 1.** Comparison of the XRD patterns of  $\text{MoO}_3$ -OA composite with and without propylamine.

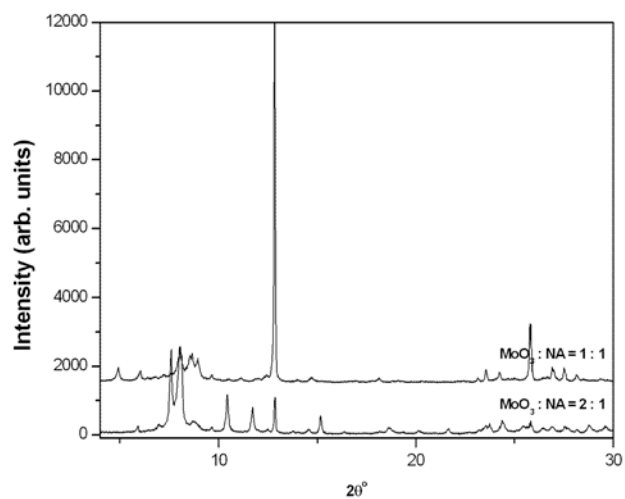

**Figure 2.** XRD patterns of MoO<sub>3</sub>-OA composite with MoO<sub>3</sub> : amine ratios of 1:1 and 2:1.

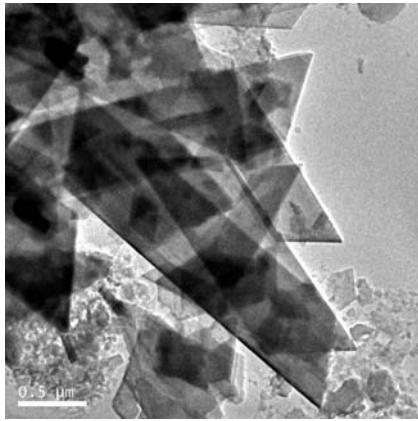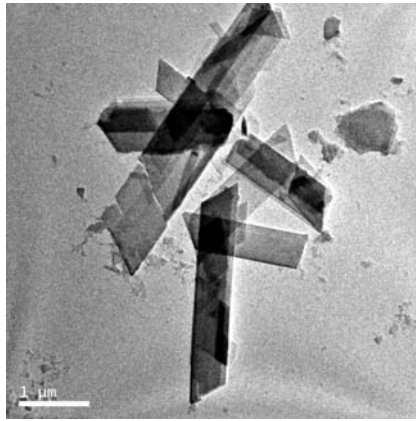

MoO<sub>3</sub>-PA composite

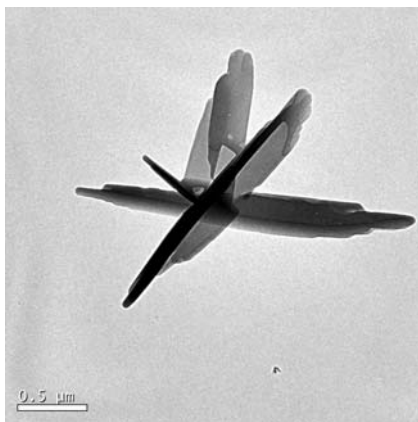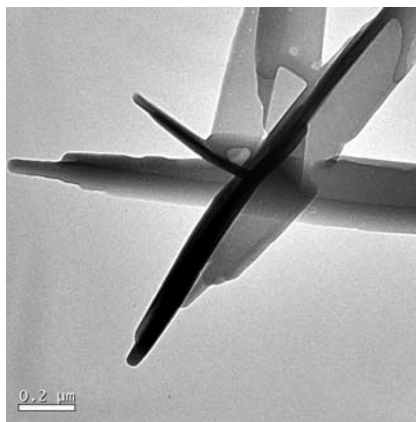

MoO<sub>3</sub>-BA composite

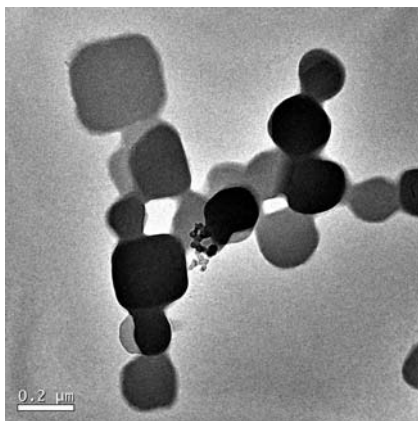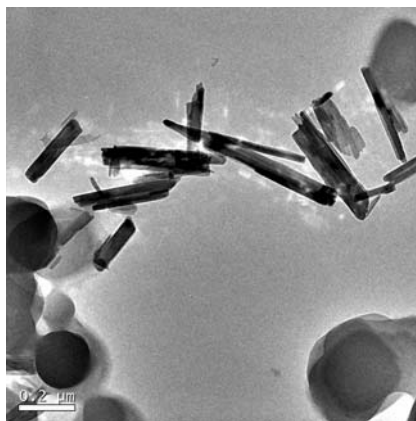

MoO<sub>3</sub>-OA composite after acid treatment

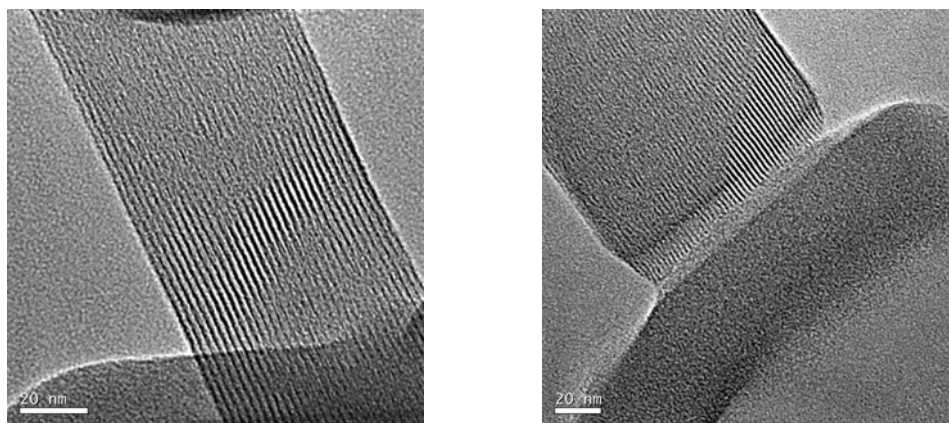

### MoO<sub>3</sub>-DDA Composite

**Figure 3.** TEM images of molybdenum oxide amine composites.

As discussed in the article, once amines are intercalated, separation of the sheets of the precursor takes place. Once separated, the sheets are highly unstable and start bending due to their high surface energy. From the Figure one can clearly observe the breaking of large sheets soon after their exfoliation.
